# Supplementary material for: Low Nasal NO in Congenital Heart Disease With Systemic Right Ventricle and Postcardiac Transplantation
Source: PubMed Central journal article supplement — J Am Heart Assoc. 2017 Dec 6;6(12):e007447. doi: 10.1161/JAHA.117.007447 (PMC5779050; doi:10.1161/jaha.117.007447), 2017-12-06
Supplement: JAH3-6-e007447-s001.pdf [file JAH3-6-e007447-s001.pdf]

# **SUPPLEMENTAL MATERIAL**

## **Data S1.**

### **Supplemental Methods**

#### **Nasal Nitric Oxide Sampling**

All sampling occurred by placing a small, occlusive nasal olive at the entrance of the naris. For patients mature enough to cooperate, nasal nitric oxide (nNO) was measured by having the patient exhale against an oral resistor to raise the soft palate and isolate the nasal passages from the rest of the lower airway during sampling. For patients mature enough to cooperate but not able to adequately execute exhalation through the resistor, an alternative forced exhalation technique, such as blowing bubbles or blowing a pinwheel, was implemented. Each naris was sampled twice for 15 seconds. For small children or those unable to cooperate, sampling was performed using the tidal breathing method or immediately upon being intubated for their procedure. Each naris was sampled once for 50 seconds. Three seconds of plateau nNO concentrations (in parts per billion) from each resistor sampling, or five peak inflections from each tidal breathing nNO concentration-sampling curve were analyzed against the sampling flow (0.3 L/min) and averaged to yield a final nNO value in nl/min. Each of these methods have been validated in the literature<sup>1-3</sup>. Subjects with multiple measurements had their most recent value used in the primary analysis. Patients who underwent heart transplant (HTx) and had both pre-HTx and post-HTx measurements had each of those values used in the respective analyses.

#### **Physiologic Variables**

Patients were categorized as oxygen desaturated if their SpO<sub>2</sub> was <90%. Because quantitative ventricular function measures are not always possible for all congenital heart disease (CHD) subtypes, systemic ventricular systolic function was categorized as either normal or dysfunctional based on the qualitative assessment by the reading pediatric cardiologist. Older, clinically stable, biventricular (BV) CHD patients who did not have oxygen saturation documented or a transthoracic echocardiogram performed on the day of their nNO assessment had their most immediate preceding values used. Data was omitted for patients if no oxygen saturation or ventricular function values were documented within one year of the nNO measurement. Patients with CHD that only had nNO values after their HTx were not included in the primary CHD analysis, since their transplanted physiology precluded them from experiencing some of the effects of certain CHD physiologies (i.e. single ventricle (SV) and systemic right ventricle [SysRV]). Because nNO increases dynamically with age until it plateaus at approximately 10 years old<sup>4</sup>, patients were separated into older (≥10-years-old) and younger groups (<10-years-old) and continuous nNO data was analyzed only for the older group. Intergroup continuous nNO data comparisons were analyzed using one way analysis of variance (ANOVA) and Student's t-test.

#### **Composite Endpoint Analysis**

To examine the relationship between low nNO and the composite endpoint of HTx or death, four CHD subjects were matched to each HTx/deceased CHD subject based on the underlying CHD phenotype and the age that the nNO was measured (to eliminate age-related effects on nNO). Kaplan-Meier plots were generated to display time-to-event based on nNO status. The date of nNO sampling was used as the initiating event. The

terminating event was HTx/death or last documented clinical visit for censored subjects. Time-to-event distributions between low and normal nNO groups were analyzed using log-rank test. In addition to the nNO log-rank univariate analysis, Cox proportional-hazards model was used to investigate time-to-event risk based on nNO status with the five physiologic variables from the primary analysis serving as covariates.

## **Supplemental Results**

### **Analysis of Subjects with nNO Measurements $\geq$ 10 Years of Age**

Because nNO rises with age and stabilizes to adult levels at 10 years of age, we also conducted a sub-analysis of the 402 (65%) subjects  $\geq$ 10-years-old, comprising 318 (79%) CHD patients, 5 (1%) post-HTx only, and 79 (20%) control subjects (Table S3). This analysis showed nNO levels that were significantly different between controls (284 $\pm$ 89 nl/min), BV-CHD (255 $\pm$ 94 nl/min), and SV-CHD (218 $\pm$ 90 nl/min) (ANOVA  $P < 0.001$ ). Pairwise comparisons showed significant differences between control vs. BV-CHD ( $P = 0.045$ ), control vs. SV-CHD ( $P < 0.001$ ), and BV-CHD vs. SV-CHD ( $P = 0.013$ ). When analyzing the CHD subjects based on the five variables from the categorical analysis, nNO levels were significantly lower in those with SV-CHD, sysRV, and SpO<sub>2</sub>  $< 90\%$  (Table S3). Similar to the categorical analysis incorporating the entire cohort, those with ventricular dysfunction had lower nNO levels, however this did not reach significance after Bonferroni adjustment of the P-value (Table S3). No difference in nNO levels were observed between heterotaxy and non-heterotaxy CHD patients. Compared to the non-transplanted CHD patients  $\geq$ 10-years-old, the post-HTx patients  $\geq$ 10-years-old had lower nNO, 194 $\pm$ 67 vs. 248 $\pm$ 95 nl/min, but this did not reach statistical significance ( $P = 0.133$ ) (Table S3).

**Table S1.** Prevalence of low nNO between various patient characteristics for both CHD and control subjects

| N = 606                 | CHD (N = 471) |            |         | Control (N = 135) |            |         |
|-------------------------|---------------|------------|---------|-------------------|------------|---------|
|                         | Low nNO       | Normal nNO | P-value | Low nNO           | Normal nNO | P-value |
| <b>Male</b>             | 84 (28%)      | 214 (72%)  | 0.109   | 13 (18%)          | 58 (82%)   | 0.505   |
| <b>Female</b>           | 61 (35%)      | 112 (65%)  |         | 9 (14%)           | 55 (86%)   |         |
| <b>White</b>            | 131 (30%)     | 308 (70%)  | 0.1     | 21 (18%)          | 97 (82%)   | 0.306   |
| <b>Non-white</b>        | 14 (44%)      | 18 (56%)   |         | 1 (6%)            | 16 (94%)   |         |
| <b>Resistor</b>         | 107 (31%)     | 237 (69%)  | 0.805   | 12 (15%)          | 69 (85%)   | 0.568   |
| <b>Tidal breathing</b>  | 38 (30%)      | 89 (70%)   |         | 10 (19%)          | 44 (81%)   |         |
| <b>Age &lt; 10 yrs*</b> | 48 (31%)      | 105 (69%)  | 0.848   | 10 (18%)          | 46 (82%)   | 0.679   |
| <b>Age ≥ 10 yrs</b>     | 97 (30%)      | 221 (70%)  |         | 12 (15%)          | 67 (85%)   |         |

\*There is a normal, physiologic increase in nNO levels until approximately 10 years of age<sup>4</sup>  
 CHD = congenital heart disease, nNO = nasal nitric oxide

**Table S2.** Spectrum of CHD subtypes and proportions with low nNO (nNO), SV-CHD, and sysRV

| <b>CHD</b>         | <b>Total</b> | <b>Low nNO</b> | <b>% Low nNO</b> | <b>SV-CHD</b> | <b>% SV-CHD</b> | <b>sysRV</b> | <b>% sysRV</b> |
|--------------------|--------------|----------------|------------------|---------------|-----------------|--------------|----------------|
| <b>HLHS</b>        | 30           | 17             | 57%              | 30            | 100%            | 30           | 100%           |
| <b>ccTGA</b>       | 24           | 10             | 42%              | 2             | 8%              | 23           | 96%            |
| <b>d-TGA</b>       | 49           | 18             | 37%              | 0             | 0%              | 28           | 57%            |
| <b>DORV</b>        | 45           | 16             | 36%              | 23            | 51%             | 23           | 51%            |
| <b>Truncus</b>     | 11           | 4              | 36%              | 0             | 0%              | 0            | 0%             |
| <b>TOF</b>         | 70           | 22             | 31%              | 0             | 0%              | 0            | 0%             |
| <b>PA</b>          | 20           | 6              | 30%              | 10            | 50%             | 1            | 5%             |
| <b>ASD/VSD</b>     | 46           | 14             | 30%              | 0             | 0%              | 0            | 0%             |
| <b>AVSD</b>        | 24           | 7              | 29%              | 6             | 25%             | 5            | 21%            |
| <b>TA</b>          | 19           | 5              | 26%              | 19            | 100%            | 0            | 0%             |
| <b>Arch</b>        | 34           | 8              | 24%              | 1             | 3%              | 1            | 3%             |
| <b>DILV</b>        | 13           | 3              | 23%              | 13            | 100%            | 0            | 0%             |
| <b>Ebstein</b>     | 19           | 4              | 21%              | 0             | 0%              | 0            | 0%             |
| <b>AV</b>          | 61           | 8              | 13%              | 0             | 0%              | 0            | 0%             |
| <b>Transplant*</b> | 16           | 11             | 69%              | 0             | 0%              | 0            | 0%             |
| <b>Other</b>       | 6            | 3              | 50%              | 2             | 33%             | 1            | 17%            |
| <b>Total</b>       | <b>487*</b>  | <b>156*</b>    |                  | <b>106</b>    | <b>21%</b>      | <b>112</b>   | <b>23%</b>     |

\*Totals higher than described in main manuscript figures and tables because four transplant patients had both pre- and post-HTx measurements, all of which were low.

HLHS = hypoplastic left heart syndrome, ccTGA = congenitally corrected transposition of the great arteries, d-TGA = dextro-transposition of the great arteries, DORV = double outlet right ventricle, Truncus = truncus arteriosus, TOF = tetralogy of Fallot, PA = pulmonary atresia (with and without intact ventricular septum), ASD/VSD = either isolated atrial septal defect, ventricular septal defect, or both atrial and ventricular septal defects, AVSD = atrioventricular septal defect (inclusive of complete/partial and balanced/unbalanced), TA = tricuspid atresia, Arch = hypoplastic aortic arch, Shone complex, DILV = double inlet left ventricle, Ebstein = Ebstein anomaly, AV = aortic valve disease including congenital aortic stenosis and bicuspid aortic valve with or without discrete coarctation, Other = one each of isolated total anomalous pulmonary venous return, anomalous left coronary artery arising from the pulmonary artery, and two each of double outlet left ventricle, and partial anomalous pulmonary venous return.

**Table S3.** Comparison of nNO values for physiologic variables in CHD subjects  $\geq 10$  years-old

| N=318*                                       | Count | nNO (nl/min) | SD  | CI      | P-value |
|----------------------------------------------|-------|--------------|-----|---------|---------|
| <b>Single ventricle CHD</b>                  | 65    | 218          | 90  | 196-240 | 0.005   |
| <b>Biventricular CHD</b>                     | 253   | 255          | 94  | 243-267 |         |
| <b>Systemic RV</b>                           | 65    | 209          | 75  | 190-228 | <0.001  |
| <b>Systemic LV</b>                           | 253   | 257          | 97  | 245-269 |         |
| <b>Ventricular dysfunction</b>               | 67    | 224          | 94  | 201-246 | 0.022   |
| <b>Normal ventricular function</b>           | 242   | 253          | 94  | 241-265 |         |
| <b>SpO<sub>2</sub> &lt; 90%</b>              | 21    | 184          | 87  | 144-223 | 0.002   |
| <b>SpO<sub>2</sub> <math>\geq</math> 90%</b> | 244   | 247          | 89  | 236-258 |         |
| <b>Heterotaxy</b>                            | 29    | 233          | 116 | 189-277 | 0.391   |
| <b>Non-heterotaxy</b>                        | 289   | 249          | 92  | 238-260 |         |
| N=323                                        | Count | nNO (nl/min) | SD  | CI      | P-value |
| <b>Transplant</b>                            | 7     | 194          | 67  | 131-256 | 0.133   |
| <b>No transplant</b>                         | 316   | 248          | 95  | 238-258 |         |

\*Bonferroni adjustment for five CHD characteristics (0.05 / 5 = 0.01)

CHD=congenital heart disease, RV=right ventricle, LV=left ventricle, nNO=nasal nitric oxide

**Table S4.** Congenital heart disease (CHD) patients used for the survival analysis. Censored patients were matched based on CHD type and age at nNO measurements

| ID#                         | CHD*   | nNO<br>(nl/min) | Age at nNO<br>(years) | Low nNO | SV-CHD | sysRV | Time-to-event<br>(months) |
|-----------------------------|--------|-----------------|-----------------------|---------|--------|-------|---------------------------|
| <b>Transplant</b>           |        |                 |                       |         |        |       |                           |
| 7351                        | HLHS   | 5               | infant                | +       | +      | +     | 8                         |
| 7382                        | HLHS   | 188             | 21                    | +       | +      | +     | 12                        |
| 7453                        | HLHS   | 5               | infant                | +       | +      | +     | 8                         |
| 7522                        | ccTGA  | 143             | 8                     | +       |        | +     | 17                        |
| 7538                        | HLHS   | 155             | 15                    | +       | +      | +     | 1                         |
| <b>Deceased</b>             |        |                 |                       |         |        |       |                           |
| 7005                        | DORV   | 204             | 15                    |         | +      | +     | 3                         |
| 7006                        | DOLV†  | 125             | 41                    | +       | +      |       | 82                        |
| 7011                        | DORV   | 85              | 11                    | +       | +      | +     | 26                        |
| 7194                        | TOF    | 161             | 26                    | +       |        |       | 42                        |
| 7283                        | AVSD   | 166             | 51                    | +       | +      | +     | 3                         |
| 7289                        | HLHS   | 32              | infant                |         | +      | +     | 1                         |
| 7328                        | DORV   | 16              | Infant                |         | +      |       | 22                        |
| 7332                        | TOF    | 202             | 56                    |         |        |       | 37                        |
| 7428                        | Arch   | 19              | Infant                |         |        |       | 2                         |
| 7446                        | PA/IVS | 160             | 32                    | +       | +      |       | 12                        |
| 7462                        | d-TGA  | 257             | 32                    |         |        | +     | 23                        |
| 7489                        | ccTGA  | 11              | Infant                |         |        | +     | 1                         |
| 7537                        | Arch   | 6               | Infant                | +       |        |       | 13                        |
| 7596                        | HLHS   | 117             | 6                     | +       | +      | +     | 3                         |
| 7669                        | d-TGA  | 7               | Infant                | +       |        | +     | 4                         |
| <b>Matched CHD subjects</b> |        |                 |                       |         |        |       |                           |
| 7018                        | DORV   | 307             | 13                    |         | +      | +     | 66                        |
| 7077                        | TGA    | 281             | 44                    |         |        | +     | 58                        |
| 7078                        | HLHS   | 161             | 18                    | +       | +      | +     | 32                        |
| 7090                        | HLHS   | 107             | 8                     | +       | +      | +     | 64                        |
| 7092                        | PA/IVS | 352             | 28                    |         |        |       | 2                         |
| 7120                        | ccTGA  | 193             | 23                    | +       |        | +     | 58                        |
| 7150                        | TOF    | 222             | 25                    |         |        |       | 58                        |
| 7169                        | HLHS   | 179             | 23                    | +       | +      | +     | 63                        |
| 7171                        | AVSD   | 208             | 36                    |         |        |       | 63                        |
| 7173                        | PA/IVS | 77              | 25                    | +       | +      |       | 63                        |
| 7188                        | d-TGA  | 259             | 34                    |         |        | +     | 55                        |
| 7197                        | PA/IVS | 304             | 28                    |         | +      |       | 12                        |
| 7199                        | HLHS   | 10              | infant                |         | +      | +     | 63                        |
| 7216                        | ccTGA  | 294             | 18                    |         |        | +     | 25                        |
| 7218                        | TA     | 161             | 36                    | +       | +      |       | 63                        |
| 7224                        | TA     | 240             | 40                    |         | +      |       | 24                        |
| 7225                        | HLHS   | 19              | infant                |         | +      | +     | 63                        |
| 7226                        | TOF    | 168             | 32                    | +       |        |       | 62                        |
| 7228                        | DORV   | 178             | 9                     | +       | +      | +     | 63                        |
| 7233                        | ccTGA  | 229             | 25                    |         |        | +     | 61                        |
| 7236                        | TOF    | 150             | 26                    | +       |        |       | 24                        |
| 7249                        | TOF    | 200             | 53                    |         |        |       | 61                        |
| 7254                        | ccTGA  | 200             | 23                    |         |        | +     | 60                        |

|      |        |     |        |   |  |   |   |    |
|------|--------|-----|--------|---|--|---|---|----|
| 7272 | DORV   | 239 | 14     |   |  | + |   | 55 |
| 7278 | HLHS   | 122 | 14     | + |  | + | + | 22 |
| 7286 | ccTGA  | 309 | 14     |   |  |   | + | 19 |
| 7287 | d-TGA  | 149 | 29     | + |  |   | + | 48 |
| 7295 | d-TGA  | 11  | infant |   |  |   | + | 41 |
| 7296 | TOF    | 259 | 48     |   |  |   |   | 51 |
| 7302 | HLHS   | 6   | infant | + |  | + | + | 55 |
| 7303 | TOF    | 209 | 54     |   |  |   |   | 50 |
| 7310 | HLHS   | 151 | 18     | + |  | + | + | 53 |
| 7312 | DORV   | 153 | 8      | + |  | + | + | 55 |
| 7325 | AVSD   | 300 | 33     |   |  | + | + | 17 |
| 7329 | TA     | 362 | 40     |   |  | + |   | 51 |
| 7336 | d-TGA  | 20  | infant |   |  |   | + | 48 |
| 7350 | DORV   | 198 | 21     | + |  | + | + | 23 |
| 7364 | ccTGA  | 239 | 24     |   |  |   | + | 46 |
| 7372 | HLHS   | 245 | 12     |   |  | + | + | 46 |
| 7375 | HLHS   | 191 | 16     | + |  | + | + | 43 |
| 7381 | d-TGA  | 12  | infant |   |  |   | + | 44 |
| 7386 | HLHS   | 3   | infant | + |  | + | + | 43 |
| 7389 | HLHS   | 52  | 2      | + |  | + | + | 18 |
| 7390 | d-TGA  | 272 | 36     |   |  |   | + | 44 |
| 7400 | HLHS   | 9   | infant |   |  | + | + | 42 |
| 7403 | ccTGA  | 273 | 22     |   |  |   | + | 20 |
| 7411 | Arch   | 15  | infant |   |  |   |   | 18 |
| 7422 | d-TGA  | 2   | infant | + |  |   | + | 40 |
| 7425 | Arch   | 17  | infant |   |  |   |   | 40 |
| 7430 | DORV   | 15  | infant |   |  | + |   | 37 |
| 7434 | HLHS   | 264 | 17     |   |  | + | + | 34 |
| 7438 | HLHS   | 12  | infant |   |  | + | + | 36 |
| 7464 | HLHS   | 40  | 1      |   |  | + | + | 23 |
| 7472 | ccTGA  | 172 | 23     | + |  |   | + | 11 |
| 7479 | AVSD   | 250 | 23     |   |  | + | + | 27 |
| 7504 | AVSD   | 181 | 52     | + |  |   |   | 20 |
| 7507 | HLHS   | 342 | 20     |   |  | + | + | 7  |
| 7513 | DORV   | 133 | 19     | + |  | + | + | 25 |
| 7523 | HLHS   | 13  | infant | + |  | + | + | 25 |
| 7526 | PA/IVS | 235 | 29     |   |  | + |   | 19 |
| 7532 | HLHS   | 233 | 8      |   |  | + | + | 23 |
| 7547 | TA     | 315 | 39     |   |  | + |   | 23 |
| 7559 | DORV   | 127 | 12     | + |  | + | + | 23 |
| 7567 | TOF    | 307 | 26     |   |  |   |   | 5  |
| 7578 | Arch   | 10  | infant |   |  |   |   | 19 |
| 7583 | HLHS   | 17  | infant |   |  | + | + | 18 |
| 7585 | Arch   | 6   | infant | + |  |   |   | 15 |
| 7597 | Arch   | 18  | infant |   |  |   |   | 12 |
| 7605 | HLHS   | 18  | 5      | + |  | + |   | 10 |
| 7611 | HLHS   | 147 | 11     | + |  | + | + | 5  |
| 7617 | DORV   | 10  | infant |   |  |   |   | 12 |
| 7620 | Arch   | 6   | infant | + |  |   |   | 12 |
| 7627 | Arch   | 26  | infant |   |  |   |   | 11 |
| 7630 | HLHS   | 17  | infant |   |  | + | + | 10 |



|      |      |     |        |   |   |   |    |
|------|------|-----|--------|---|---|---|----|
| 7633 | DORV | 1   | infant | + | + | + | 11 |
| 7635 | DORV | 226 | 13     |   |   | + | 9  |
| 7644 | DORV | 8   | infant | + |   |   | 7  |
| 7647 | HLHS | 250 | 28     |   |   | + | 8  |
| 7651 | TOF  | 194 | 53     | + |   |   | 4  |
| 7673 | Arch | 20  | infant |   |   |   | 5  |

\* Primary CHD diagnosis listed

† Only DOLV patient in the study. Matched with four tricuspid atresia patients of the same age, all single ventricle and all with systemic left ventricles.

CHD = congenital heart disease, nNO = nasal nitric oxide, SV = single ventricle, RV = right ventricle, HLHS = hypoplastic left heart syndrome, ccTGA = congenitally corrected transposition of the great arteries, DORV = double outlet right ventricle, DOLV = double outlet left ventricle, TOF = tetralogy of Fallot, AVSD = atrioventricular septal defect, Arch = hypoplastic aortic arch, Shone complex, PA/IVS = pulmonary atresia with intact ventricular septum, d-TGA = dextro-transposition of the great arteries, TA = tricuspid atresia

**Table S5.** Variable comparison between the low nNO vs. normal nNO groups used in the composite endpoint analysis

| <b>Variable</b>          | <b>Low nNO (N = 44)</b> | <b>Normal nNO (N = 56)</b> | <b>P-value</b> |
|--------------------------|-------------------------|----------------------------|----------------|
| Single ventricle         | 29 (66%)                | 26 (46%)                   | 0.052          |
| Systemic right ventricle | 30 (68%)                | 32 (57%)                   | 0.259          |
| Heterotaxy               | 4 (9%)                  | 9 (16%)                    | 0.303          |
| Ventricular dysfunction  | 16 (36%)                | 15 (27%)                   | 0.332          |
| SpO <sub>2</sub> ≤ 90%   | 17 (40%)                | 19 (35%)                   | 0.595          |
| Experienced endpoint     | 13 (30%)                | 7 (13%)                    | 0.034          |

**Table S6.** List of patients who underwent HTx with pre- and/or post-HTx nNO measurements

| ID#  | Original CHD* | SV | sysRV | Age Pre-HTx nNO (years) | Pre-HTx nNO (nl/min) | Low nNO Pre-Htx | Age at HTx (years) | Age at Post-HTx nNO (years) | Post-HTx nNO (nl/min) | Low nNO Post-Htx |
|------|---------------|----|-------|-------------------------|----------------------|-----------------|--------------------|-----------------------------|-----------------------|------------------|
| 7013 | TA            | +  |       |                         |                      |                 | 15                 | 18                          | 260                   |                  |
| 7014 | DORV          | +  | +     |                         |                      |                 | infant             | 6                           | 145                   | +                |
| 7042 | HLHS          | +  | +     |                         |                      |                 | infant             | 5                           | 170                   |                  |
| 7076 | DORV          | +  | +     |                         |                      |                 | 12                 | 17                          | 70                    | +                |
| 7113 | DORV          | +  | +     |                         |                      |                 | 2                  | 5                           | 119                   |                  |
| 7351 | HLHS          | +  | +     | infant                  | 5                    | +               | infant             | 2                           | 52                    | +                |
| 7382 | HLHS          | +  | +     | 21                      | 188                  | +               | 22                 | 23                          | 178                   | +                |
| 7413 | AVSD          | +  | +     |                         |                      |                 | 1                  | 3                           | 4                     | +                |
| 7418 | PA/IVS        | +  |       |                         |                      |                 | infant             | 3                           | 7                     | +                |
| 7432 | HLHS          | +  | +     |                         |                      |                 | infant             | 10                          | 182                   | +                |
| 7435 | TGA           |    |       |                         |                      |                 | 3                  | 10                          | 271                   |                  |
| 7442 | TGA           |    |       |                         |                      |                 | 14                 | 14                          | 221                   |                  |
| 7453 | HLHS          | +  | +     | infant                  | 5                    | +               | infant             | 1                           | 37                    | +                |
| 7522 | ccTGA         |    | +     | 8                       | 143                  | +               |                    |                             |                       |                  |
| 7538 | HLHS          | +  | +     | 15                      | 155                  | +               |                    |                             |                       |                  |
| 7596 | HLHS          | +  | +     | 5                       | 41                   | +               | 5                  | 6                           | 117                   | +                |
| 7632 | TGA           |    |       |                         |                      |                 | infant             | 8                           | 152                   | +                |
| 7668 | HLHS          | +  | +     |                         |                      |                 | infant             | 14                          | 174                   | +                |

\* Primary CHD diagnosis listed

HTx = heart transplant, nNO = nasal nitric oxide, CHD = congenital heart disease, SV = single ventricle, SysRV = systemic right ventricle, TA = tricuspid atresia, DORV = double outlet right ventricle, HLHS = hypoplastic left heart syndrome, AVSD = atrioventricular septal defect, PA/IVS = pulmonary atresia with intact ventricular septum, TGA = d-transposition of the great arteries, ccTGA = congenitally corrected transposition of the great arteries

**Figure S1. Bar graph illustrating the prevalence of low nNO by specific CHD phenotypes (magenta bars).**

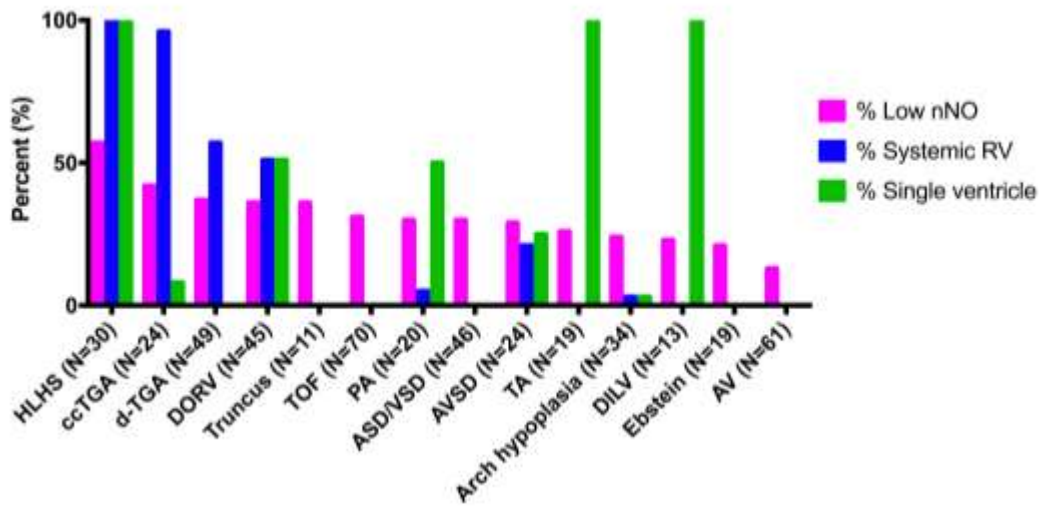

Co-illustrated are the percentages of systemic right ventricle (blue bars) and single ventricle phenotypes (green bars). Note the four CHD types with the highest prevalence of low nNO also have the highest prevalence of systemic right ventricle. TA and DILV are 100% single ventricle but 0% systemic right ventricle and as such, have a relatively low prevalence of low nNO.

HLHS = hypoplastic left heart syndrome, ccTGA = congenitally corrected transposition of the great arteries, d-TGA = dextro-transposition of the great arteries, DORV = double outlet right ventricle, Truncus = truncus arteriosus, TOF = tetralogy of Fallot, PA = pulmonary atresia (with and without intact ventricular septum), ASD/VSD = either isolated atrial septal defect, ventricular septal defect, or both atrial and ventricular septal defects, AVSD = atrioventricular septal defect (inclusive of complete/partial and balanced/unbalanced), TA = tricuspid atresia, Arch = hypoplastic aortic arch, Shone complex, DILV = double inlet left ventricle, Ebstein = Ebstein anomaly, AV = aortic valve disease including congenital aortic stenosis and bicuspid aortic valve with or without discrete coarctation

### **Supplemental References:**

1. Collins SA, Gove K, Walker W, Lucas JS. Nasal nitric oxide screening for primary ciliary dyskinesia: systematic review and meta-analysis. *Eur Respir J*. 2014;44: 1589-1599.
2. Chang CC, Lien SH, Liu TY, Hua YM, Lee CM, Yuh YS. Nasal nitric oxide in infants before and after extubation. *Pediatr Pulmonol*. 2008;43: 1072-1077.
3. ATS/ERS recommendations for standardized procedures for the online and offline measurement of exhaled lower respiratory nitric oxide and nasal nitric oxide, 2005. *Am J Respir Crit Care Med*. 2005;171: 912-930.
4. Lundberg JO, Weitzberg E. Nasal nitric oxide in man. *Thorax*. 1999;54: 947-952.
